# Supplementary material
Source: bioRxiv or medRxiv preprint supplement (https://www.biorxiv.org/highwire/filestream/90758/field_highwire_adjunct_files/1/286260-2.pdf)
Supplement: Supplementary file [file 286260-2.pdf]

# Supplement

## Evidence for a potential role of miR-1908-5p and miR-3614-5p in autoimmune disease risk using genome-wide analyses

Inken Wohlers, Lars Bertram, Christina M. Lill

### Content

Supplementary Methods.....page 2

Supplementary Tables.....page 4

Supplementary Figures.....page 8

Supplementary References.....page 22

## **Supplementary Methods**

**RNA-Seq and genotype data sources:** GEUVADIS raw data files are accessible via the European Nucleotide Archive (<http://www.ebi.ac.uk/ena>) under accession numbers “ERP001942” and “ERP001941”. Read counts and eQTLs of the original study are available via the ArrayExpress database [<https://www.ebi.ac.uk/arrayexpress/>; accession numbers E-GEUV-1 and E-GEUV-2]. The most recent whole-genome sequencing-based genotype data generated by the 1000 Genomes (1000G) project (GRCh38; phase 3, release date: 20130502) in VCF format was obtained at [ftp://ftp.1000genomes.ebi.ac.uk/vol1/ftp/release/20130502/supporting/GRCh38\\_positions/](ftp://ftp.1000genomes.ebi.ac.uk/vol1/ftp/release/20130502/supporting/GRCh38_positions/).

**Computation of principal components:** Processing of the 1000G data was performed using VCFTOOLS (1). In order to calculate principal components (PC), insertions and deletions and variants within regions of high linkage disequilibrium (LD) (2) were removed from the dataset and LD pruning (--indep-pairwise 1000 10 0.05) was performed using PLINK v.1.07 (3). PCs were calculated using SMARTPCA v.1.3050 from the Eigensoft package (4) with default parameters. Subsequently, Tracy-Widom statistics for determining (unsupervised) influential PCs (4) were computed, and, as a result, the first nine PCs were used as covariates in all subsequent analyses.

**Processing of small RNA and mRNA sequencing data:** MiRNA sequences were downloaded for miRBase database release 21 from <ftp://mirbase.org/pub/mirbase/21/mature.fa.gz>. For mapping, KALLISTO version 0.42.4 (5) with the options --single, --fragment-length=150, -s 15, number of bootstraps set to 100. Default settings were used for all other parameters. As expected, we observed a high correlation

between the miRNA read counts that we estimated from the raw data and the miRNA counts made publicly available in the original study (6) ( $r=0.99$  across all miRNAs investigated in both studies). Reads of mRNAs were mapped to 207,167 coding and non-coding transcript sequences (obtained from the Ensembl database v.78; [ftp://ftp.ensembl.org/pub/release-78/fasta/homo\\_sapiens/{cdna,ncrna}](ftp://ftp.ensembl.org/pub/release-78/fasta/homo_sapiens/{cdna,ncrna})) using KALLISTO (v. 0.42.4 (5)) with default parameters and with the number of bootstraps set to 100. Between-sample normalizations of estimated read counts (EST) and of transcripts per million mapped reads (TPM) were performed using DESEQ2 (7). For batch effect removal, the program PEER (8,9) was used with 10 factors for miRNAs and 20 factors for transcripts. PC analysis showed that for both miRNA and transcripts, expression clustering by either laboratory or population was barely noticeable after removing hidden covariates from the dataset (Supplementary Figure 1).

**Comparison of our miRNA eQTLs to GEUVADIS miRNA eQTLs:** The  $\beta$  of our eQTL linear regression analyses showed a high correlation with the  $r$ -value of the publicly available GEUVADIS eQTLs (6) (Pearson's  $r=0.95$ ). In addition, the effect directions for all miRNA eQTLs obtained in our and in the GEUVADIS analysis matched. Thus, our analysis results are comparable to the GEUVADIS results, with the following differences: We (i) use updated miRNA annotations and SNP IDs, (ii) are more stringent on the number of samples in which a miRNA needs to be expressed to be included in eQTL analysis, and (iii) use genotypes obtained from whole-genome sequencing instead of imputed genotypes for some individuals.

## **Supplementary Tables**

| <b>population samples</b> |    |
|---------------------------|----|
| CEU                       | 84 |
| FIN                       | 90 |
| GBR                       | 84 |
| TSI                       | 87 |

**Table 1: Strata of European ethnicity included in the GEUVADIS dataset.**

| <b>laboratory</b> | <b>mRNA samples</b> | <b>miRNA samples</b> |
|-------------------|---------------------|----------------------|
| CNAG_CRG          | 73                  | 70                   |
| HMGU              | 34                  | 37                   |
| ICMB              | 45                  | 45                   |
| LUMC              | 31                  | 32                   |
| MPIMG             | 47                  | 47                   |
| UNIGE             | 85                  | 83                   |
| UU                | 30                  | 31                   |

**Table 2: Sequencing centers contributing GEUVADIS mRNA and miRNA samples.**

|          | FADS1 | FADS2 | TMEM285 | FADS3 | RP11-467L20.10 | BEST1 | DAGLA |
|----------|-------|-------|---------|-------|----------------|-------|-------|
| rs968567 | 2*    | 22*+  | 2*      | 0     | 0              | 0     | 0     |
| rs174537 | 10*   | 16*+  | 6*      | 1     | 1              | 1     | 0     |
| rs102275 | 8*    | 12*+  | 3*      | 1     | 1              | 0     | 0     |
| rs174561 | 12*   | 16*+  | 6*      | 1     | 1              | 0     | 1     |

**Table 3: The number of tissues for which the CD and RA index SNPs are eQTLs for a given gene within analysis of the GTEx data.** The CD and RA index SNPs also represent miRNA eQTLs for hsa-miR-1908-5p. An asterisk \* denotes that there is at least one exon eQTL for this gene in the analysis of the GEUVADIS data, a plus sign + denotes gene eQTLs in the analysis of the GEUVADIS data.

|                                  |       |         | CD               |                | RA               |                |
|----------------------------------|-------|---------|------------------|----------------|------------------|----------------|
| methods                          | conc. | targets | p X <sup>2</sup> | p emp          | p X <sup>2</sup> | p emp          |
| miRTarBase                       | -     | 95      | 6.58e-2          | 7.38e-2        | 1.56e-1          | 3.67e-1        |
| Mirwalk/Miranda/rna22/Targetscan | 2     | 3734    | <b>8.98e-9</b>   | <b>4.19e-5</b> | <b>4.83e-3</b>   | <b>2.77e-3</b> |
| Mirwalk/Miranda/rna22/Targetscan | 3     | 1333    | <b>5.80e-5</b>   | <b>2.72e-3</b> | <b>3.81e-3</b>   | <b>1.98e-2</b> |

**Table 4: PASCAL X<sup>2</sup> and empirical p-values for the enrichment of GWAS associations for Crohn's disease (CD) and rheumatoid arthritis (RA) in miR-1908-5p target genes.** Significant p-values ( $\alpha=0.05$ ) are highlighted in bold. Term "conc." denotes the number of methods that need to concordantly predict a target gene in order to include it in the enrichment analysis. Term "targets" refers to the number of target genes obtained by the corresponding method(s).

| methods                          | conc. | targets | p X <sup>2</sup> | p emp          |
|----------------------------------|-------|---------|------------------|----------------|
| miRTarBase                       | -     | 167     | 5.03e-1          | 5.68e-1        |
| Mirwalk/Miranda/rna22/Targetscan | 2     | 5417    | <b>3.21e-8</b>   | <b>1.19e-5</b> |
| Mirwalk/Miranda/rna22/Targetscan | 3     | 1982    | <b>1.16e-4</b>   | <b>2.36e-3</b> |

**Table 5: PASCAL X<sup>2</sup> and empirical p-values for the enrichment of GWAS associations for Crohn's disease in miR-3614-5p target genes.** See Table 4 for legend.

| GWAS lead SNP                      |              |          | MiRNA           |           | eQTL SNP    |              |          | LD      | JLIM    |
|------------------------------------|--------------|----------|-----------------|-----------|-------------|--------------|----------|---------|---------|
| SNP                                | Pos          | P        | MiRNA           | Dist lead | SNP         | Pos          | P        | LD [R2] | P JLIM  |
| <b>Type 1 diabetes</b>             |              |          |                 |           |             |              |          |         |         |
| <i>Onengut-Gumuscu et al. (10)</i> |              |          |                 |           |             |              |          |         |         |
| rs56994090                         | 14:100840110 | 1.13e-11 | hsa-miR-345-5p  | 532,234   | rs79160867  | 14:100837091 | 7.38e-03 | 0.04    | 0.84    |
| rs402072                           | 19:46715865  | 4.72e-08 | hsa-miR-769-5p  | 696,904   | rs11668878  | 19:46765116  | 3.08e-03 | 0.03    | 0.81    |
| rs679574                           | 19:48702851  | 5.22e-14 | hsa-miR-150-5p  | 797,981   | rs11880281  | 19:48671478  | 5.00e-03 | 0.15    | 0.75    |
| rs34536443                         | 19:10352442  | 4.39e-15 | hsa-miR-199a-3p | 464,987   | rs91755     | 19:10362894  | 2.71e-03 | 0.06    | 0.77    |
| rs4820830                          | 22:30135102  | 1.20e-12 | hsa-miR-3653-3p | 801,926   | rs5997592   | 22:30213107  | 8.14e-04 | 0.09    | 0.98    |
| rs4820830                          | 22:30135102  | 1.20e-12 | hsa-miR-3653-5p | 801,876   | rs79955051  | 22:30046891  | 5.15e-03 | 0.03    | 0.79    |
| rs229533                           | 22:37191071  | 1.79e-08 | hsa-miR-659-5p  | 656,661   | rs71317032  | 22:37199116  | 3.47e-03 | 0.27    | 0.83    |
| rs6476839                          | 9:4290823    | 1.03e-09 | hsa-miR-101-3p  | 559,522   | rs117421312 | 9:4261744    | 9.62e-04 | 0.03    | 0.95    |
| <b>Rheumatoid arthritis</b>        |              |          |                 |           |             |              |          |         |         |
| <i>Eyre et al. (11)</i>            |              |          |                 |           |             |              |          |         |         |
| rs34536443                         | 19:10352442  | 2.70e-13 | hsa-miR-199a-3p | 464,987   | rs91755     | 19:10362894  | 2.71e-03 | 0.06    | 0.78    |
| <b>Celiac disease</b>              |              |          |                 |           |             |              |          |         |         |
| <i>Trynka et al. (12)</i>          |              |          |                 |           |             |              |          |         |         |
| rs4821124                          | 22:21625000  | 5.72e-11 | hsa-miR-130b-3p | 28,354    | rs447001    | 22:21656629  | 8.69e-05 | 0.13    | 1       |
| rs4821124                          | 22:21625000  | 5.72e-11 | hsa-miR-130b-5p | 28,316    | rs447001    | 22:21656629  | 1.59e-03 | 0.13    | 1       |
| rs4821124                          | 22:21625000  | 5.72e-11 | hsa-miR-301b-3p | 28,025    | rs384262    | 22:21658483  | 3.91e-03 | 0.04    | 0.96    |
| rs76830965                         | 3:159919889  | 2.57e-27 | hsa-miR-15b-5p  | 484,718   | rs33052     | 3:159882300  | 2.94e-03 | 0.05    | 0.8     |
| rs76830965                         | 3:159919889  | 2.57e-27 | hsa-miR-16-2-3p | 484,908   | rs2243130   | 3:159993205  | 1.99e-03 | 0.00    | 0.75    |
| rs76830965                         | 3:159919889  | 2.57e-27 | hsa-miR-16-5p   | 484,865   | rs79300081  | 3:159910520  | 2.71e-03 | 0.01    | 0.86    |
| <b>Multiple sclerosis</b>          |              |          |                 |           |             |              |          |         |         |
| <i>Beecham et al. (13)</i>         |              |          |                 |           |             |              |          |         |         |
| rs6677309                          | 1:116537544  | 1.45e-28 | hsa-miR-320b    | 134,243   | rs116610628 | 1:116577119  | 2.21e-03 | 0.01    | 0.91    |
| rs34383631                         | 11:61025858  | 5.69e-10 | hsa-miR-1908-5p | 789,351   | rs72928583  | 11:61046564  | 8.26e-03 | 0.09    | 0.59    |
| rs1800693                          | 12:6330843   | 6.92e-16 | hsa-miR-200c-3p | 632,899   | rs113559360 | 12:6312886   | 2.76e-03 | 0.01    | 0.86    |
| rs4796791                          | 17:42378745  | 1.81e-08 | hsa-miR-5010-3p | 135,522   | rs113366589 | 17:42364598  | 7.13e-03 | 0.05    | 0.74    |
| rs1014486                          | 3:159973324  | 1.16e-09 | hsa-miR-15b-5p  | 431,283   | rs33052     | 3:159882300  | 2.94e-03 | 0.00    | 0.79    |
| rs1014486                          | 3:159973324  | 1.16e-09 | hsa-miR-16-2-3p | 431,473   | rs2243130   | 3:159993205  | 1.99e-03 | 0.02    | 0.74    |
| rs1014486                          | 3:159973324  | 1.16e-09 | hsa-miR-16-5p   | 431,430   | rs79300081  | 3:159910520  | 2.71e-03 | 0.04    | 0.56    |
| <b>Primary biliary cirrhosis</b>   |              |          |                 |           |             |              |          |         |         |
| <i>Liu et al. (14)</i>             |              |          |                 |           |             |              |          |         |         |
| rs1800693                          | 12:6330843   | 1.18e-14 | hsa-miR-141-3p  | 633,312   | rs11064135  | 12:6305745   | 2.25e-03 | 0.07    | 0.85    |
| rs1800693                          | 12:6330843   | 1.18e-14 | hsa-miR-200c-3p | 632,899   | rs11831297  | 12:6381443   | 4.57e-03 | 0.00    | 0.59    |
| rs11117433                         | 16:85985910  | 1.41e-09 | hsa-miR-1910-5p | 244,241   | rs72807051  | 16:85972327  | 2.11e-03 | 0.07    | 0.92    |
| rs11117433                         | 16:85985910  | 1.41e-09 | hsa-miR-6774-3p | 67,514    | rs9674233   | 16:85978993  | 1.60e-03 | 0.07    | 0.95    |
| rs34536443                         | 19:10352442  | 1.23e-12 | hsa-miR-199a-3p | 464,987   | rs91755     | 19:10362894  | 2.71e-03 | 0.06    | 0.79    |
| rs522127                           | 3:160016881  | 2.98e-22 | hsa-miR-16-2-3p | 387,916   | rs2243130   | 3:159993205  | 1.99e-03 | 0.00    | 0.91    |
| rs35188261                         | 7:129043485  | 6.52e-22 | hsa-miR-182-5p  | 726,962   | rs4728152   | 7:129098490  | 7.17e-04 | 0.03    | 0.99    |
| rs35188261                         | 7:129043485  | 6.52e-22 | hsa-miR-183-5p  | 731,482   | rs1077482   | 7:129103017  | 3.96e-05 | 0.04    | 1       |
| <b>Ankylosing spondylitis</b>      |              |          |                 |           |             |              |          |         |         |
| <i>Cortes et al. (15)</i>          |              |          |                 |           |             |              |          |         |         |
| rs1860545                          | 12:6337611   | 2.78e-10 | hsa-miR-200c-3p | 626,131   | rs113559360 | 12:6312886   | 2.76e-03 | 0.01    | 0.91    |
| rs35164067                         | 19:10414505  | 3.43e-10 | hsa-miR-199a-3p | 402,924   | rs13346189  | 19:10505968  | 4.51e-04 | 0.01    | 0.9     |
| rs1128905                          | 9:136359387  | 6.95e-09 | hsa-miR-126-5p  | 311,229   | rs117893486 | 9:136419135  | 7.87e-03 | 0.05    | 0.64    |
| <b>Narcolepsy</b>                  |              |          |                 |           |             |              |          |         |         |
| <i>Faraco et al. (16)</i>          |              |          |                 |           |             |              |          |         |         |
| rs10995245                         | 10:62631615  | 4.81e-08 | hsa-miR-1296-5p | 741,397   | rs113879650 | 10:62689017  | 4.56e-03 | 0.16    | 0.17864 |
| <b>Psoriasis</b>                   |              |          |                 |           |             |              |          |         |         |
| <i>Tsoi et al. (17)</i>            |              |          |                 |           |             |              |          |         |         |

|             |             |          |                 |         |             |             |          |      |         |
|-------------|-------------|----------|-----------------|---------|-------------|-------------|----------|------|---------|
| rs117135073 | 10:62595406 | 2.20e-12 | hsa-miR-1296-5p | 777,606 | rs113879650 | 10:62689017 | 4.56e-03 | 0.00 | 0.75    |
| rs77520588  | 1:116744732 | 5.94e-15 | hsa-miR-320b    | 72,945  | rs77520588  | 1:116744732 | 2.76e-03 | 1.00 | 0.01167 |
| rs10744705  | 12:6389529  | 1.69e-08 | hsa-miR-200c-3p | 574,213 | rs11831297  | 12:6381443  | 4.57e-03 | 0.00 | 0.88    |
| rs34536443  | 19:10352442 | 9.01e-14 | hsa-miR-199a-3p | 464,987 | rs91755     | 19:10362894 | 2.71e-03 | 0.06 | 0.77    |
| rs3135952   | 3:48468811  | 2.46e-17 | hsa-miR-191-3p  | 551,820 | rs73074378  | 3:48404830  | 7.25e-03 | 0.01 | 0.53    |
| rs3135952   | 3:48468811  | 2.46e-17 | hsa-miR-425-5p  | 551,388 | rs4858795   | 3:48473670  | 1.68e-03 | 0.04 | 0.11992 |

**Table 6: Loci and miRNAs assessed with JLIM to find statistical evidence for a shared genetic effect.** Only immunohip-based GWAS data from loci that are densely genotyped on the immunohip were used.

## Supplementary Figures

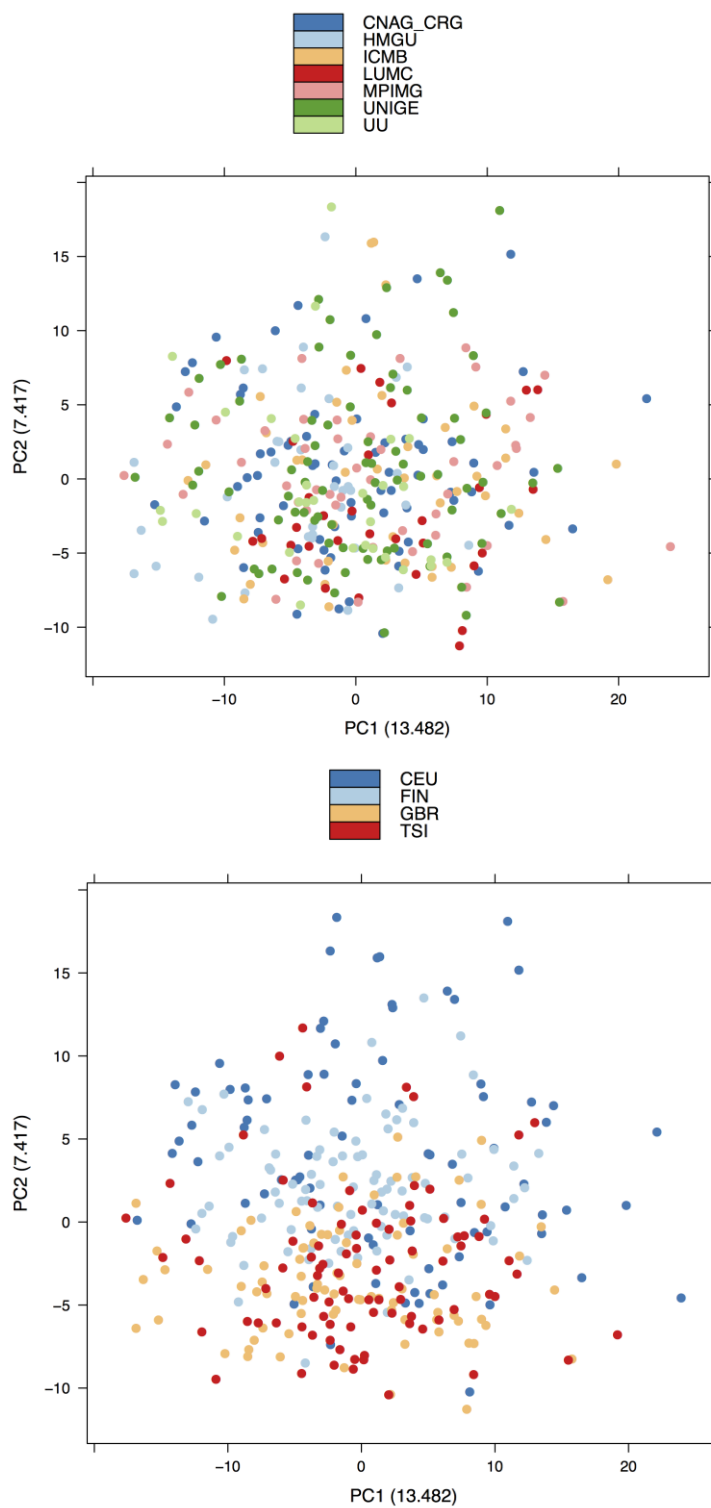

**Figure 1: PC analysis of between-sample normalized, DESEQ2 variance-stabilized miRNA counts.** Samples are colored according to lab and population.



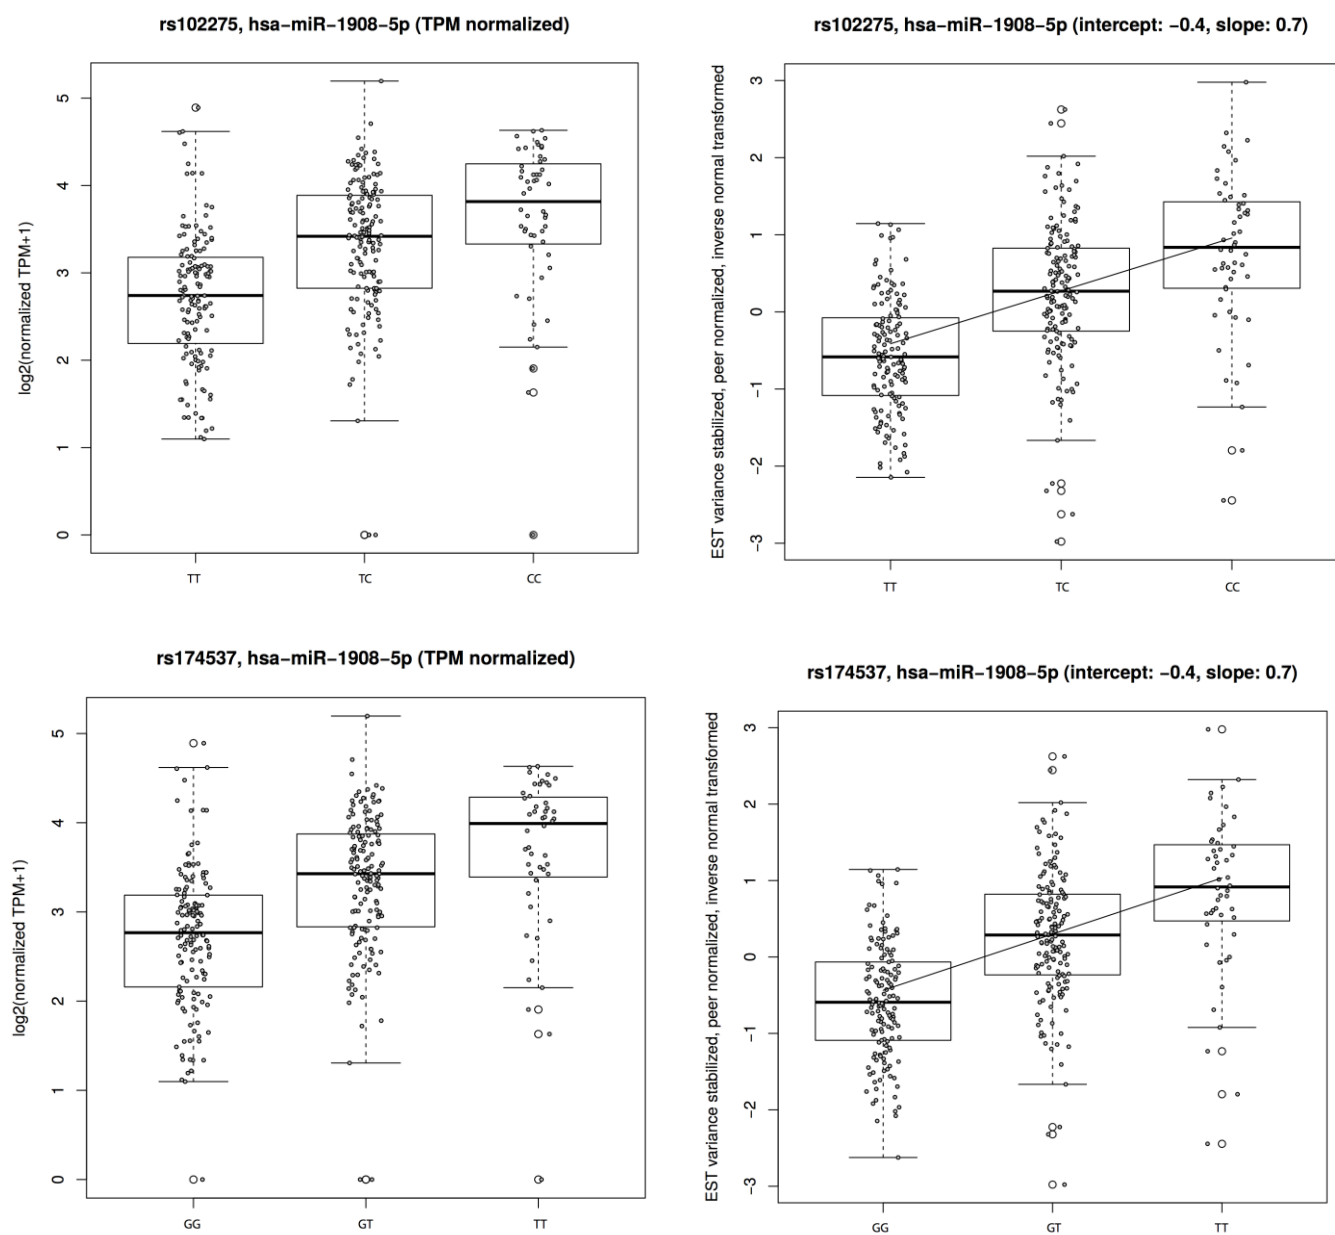

**Figure 2: hsa-miR-1908-5p gene expression levels according to genotypes of Crohn's disease risk SNPs rs102275 and rs174537.** Left: Boxplots of expression data quantified in transcripts per million (TPM), stratified by genotype. Right: Boxplots of processed expression used for eQTL analysis.

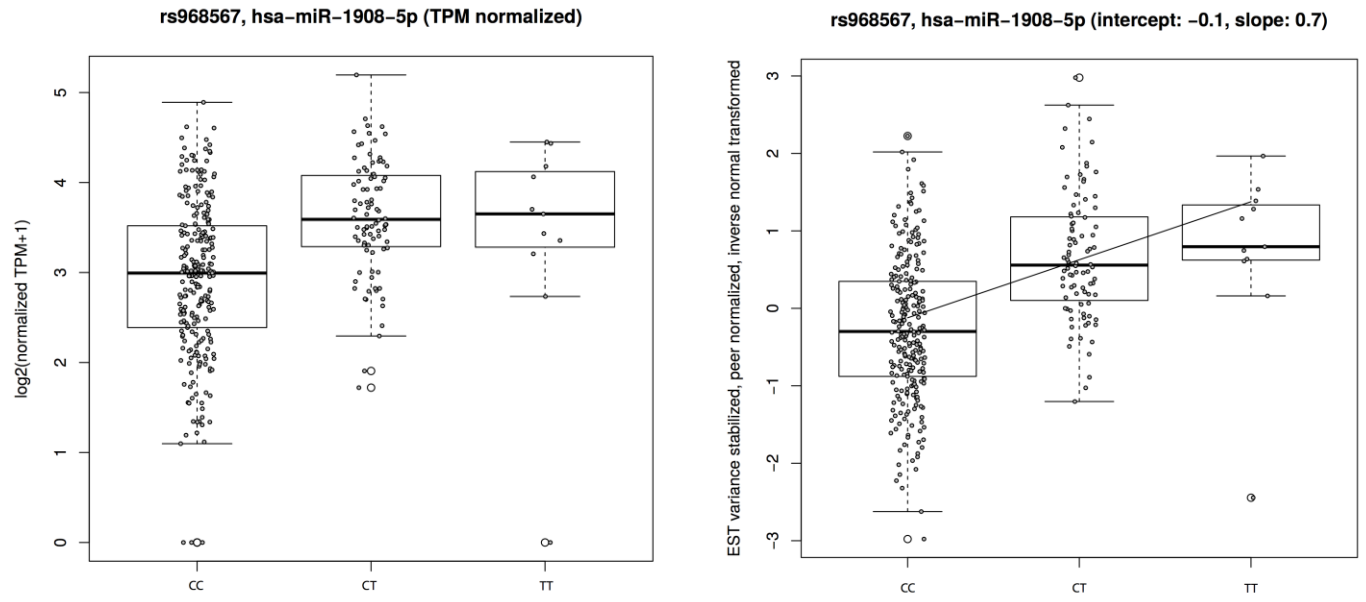

**Figure 3: hsa-miR-1908-5p gene expression levels according to genotypes of rheumatoid arthritis risk SNP rs968567. See Suppl. Figure 2 for legend.**

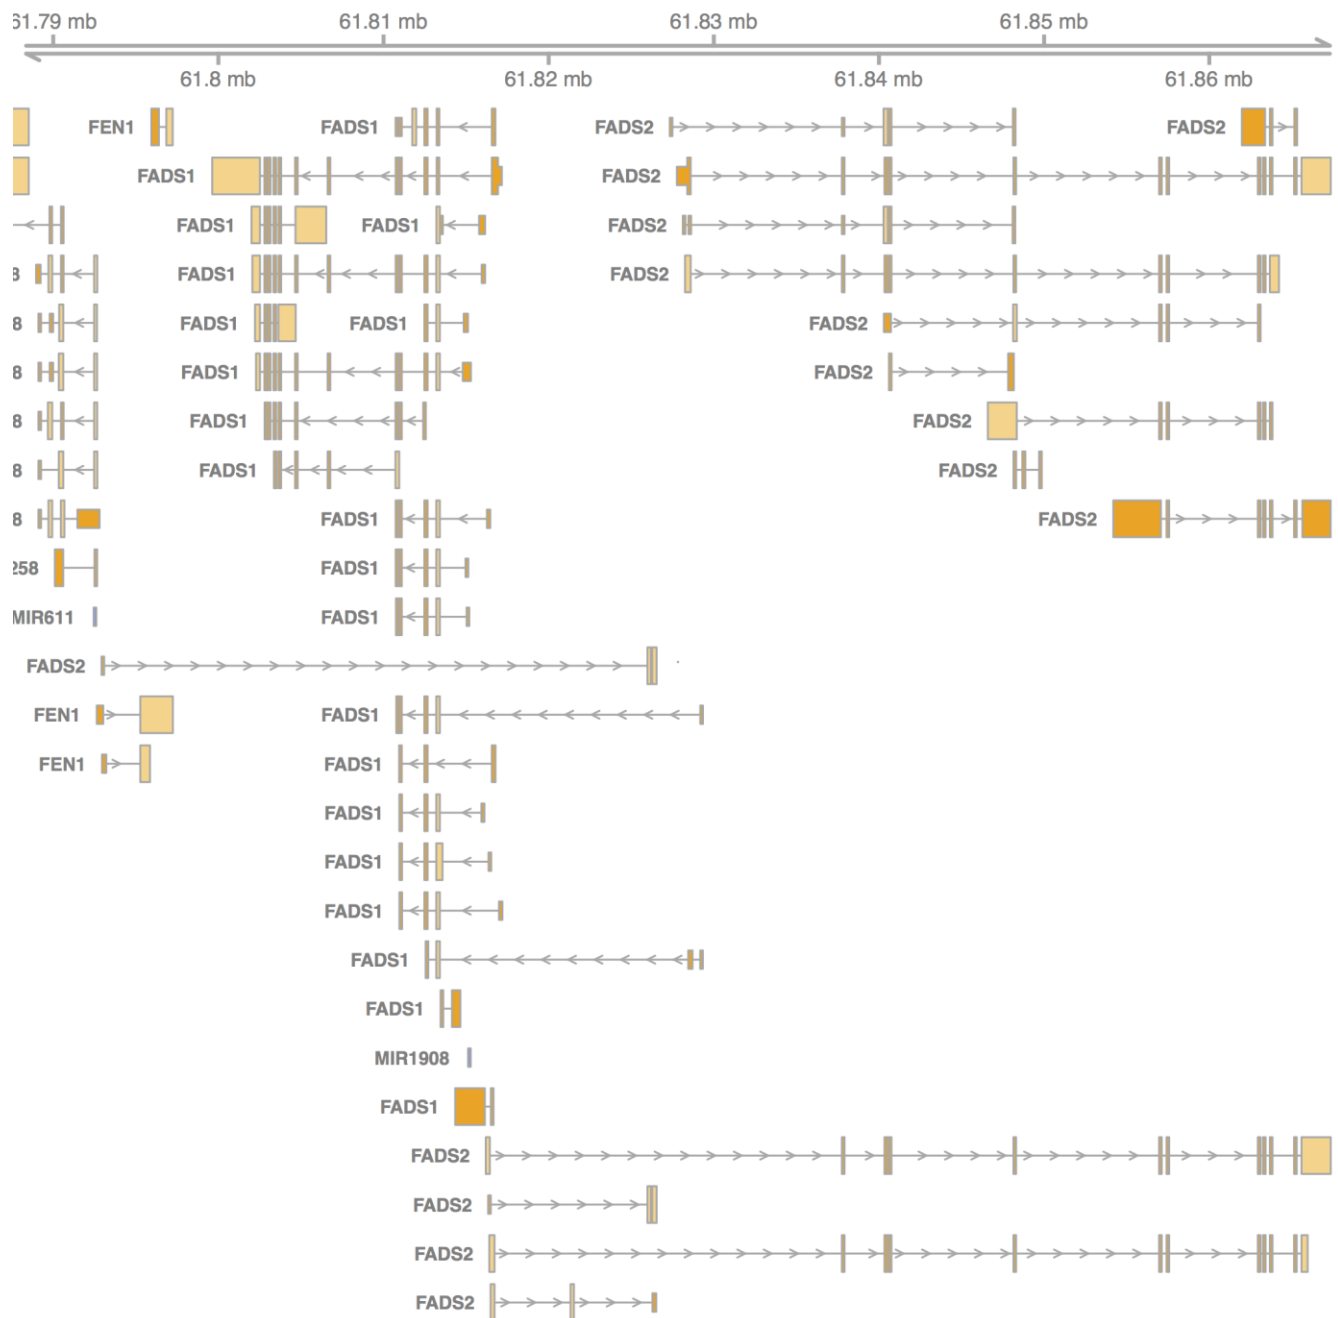

**Figure 4: Region of transcripts that overlap mir-1908.** Narrow boxes denote untranslated regions.

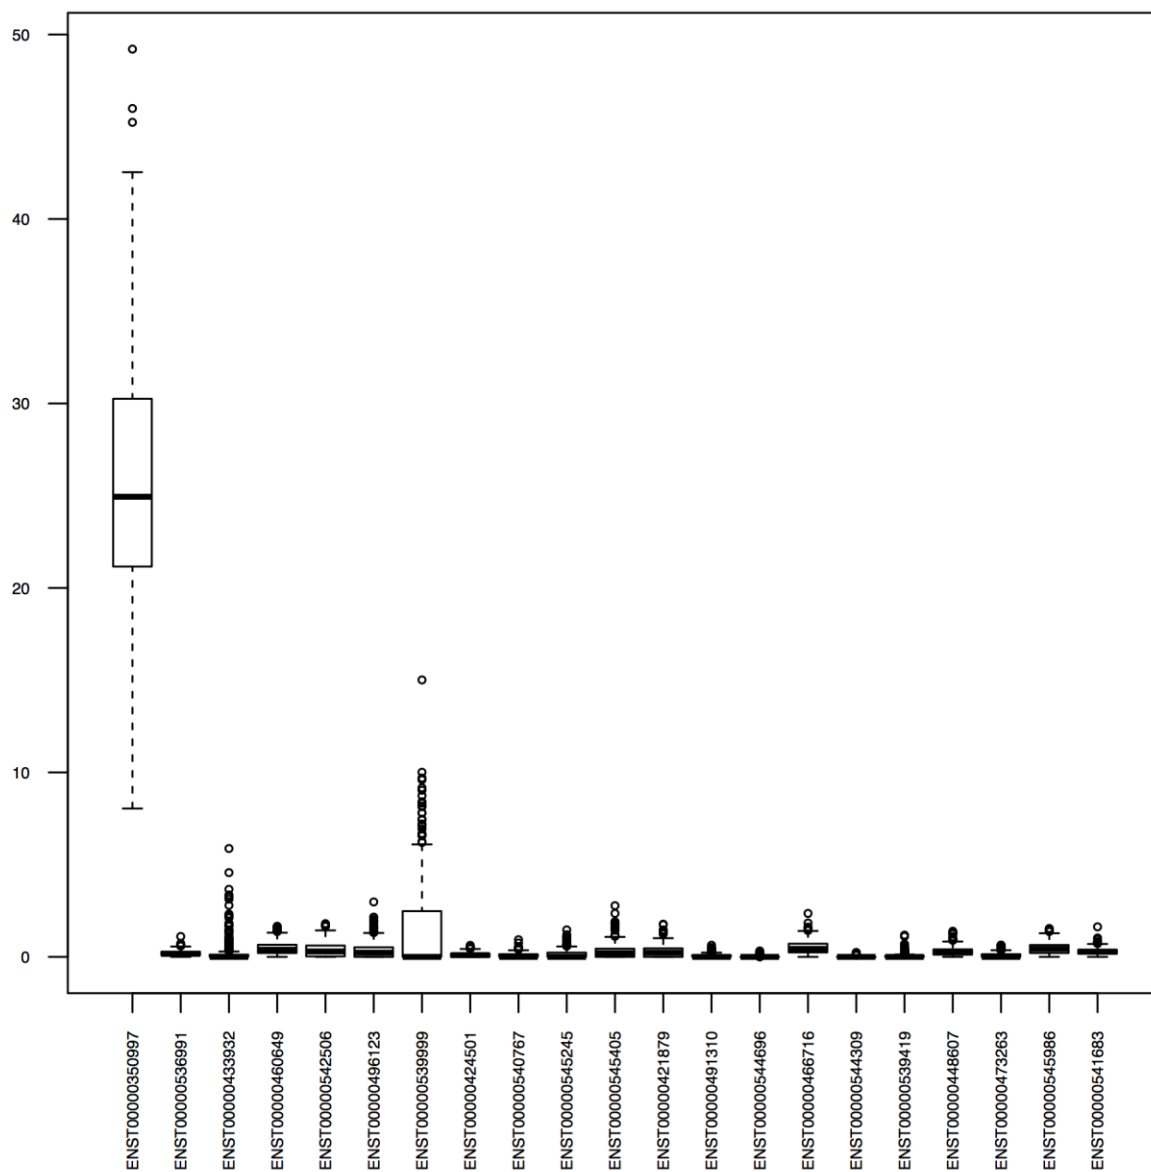

**Figure 5: Expression of FADS1 isoforms in transcripts per million mapped reads (TPM).**

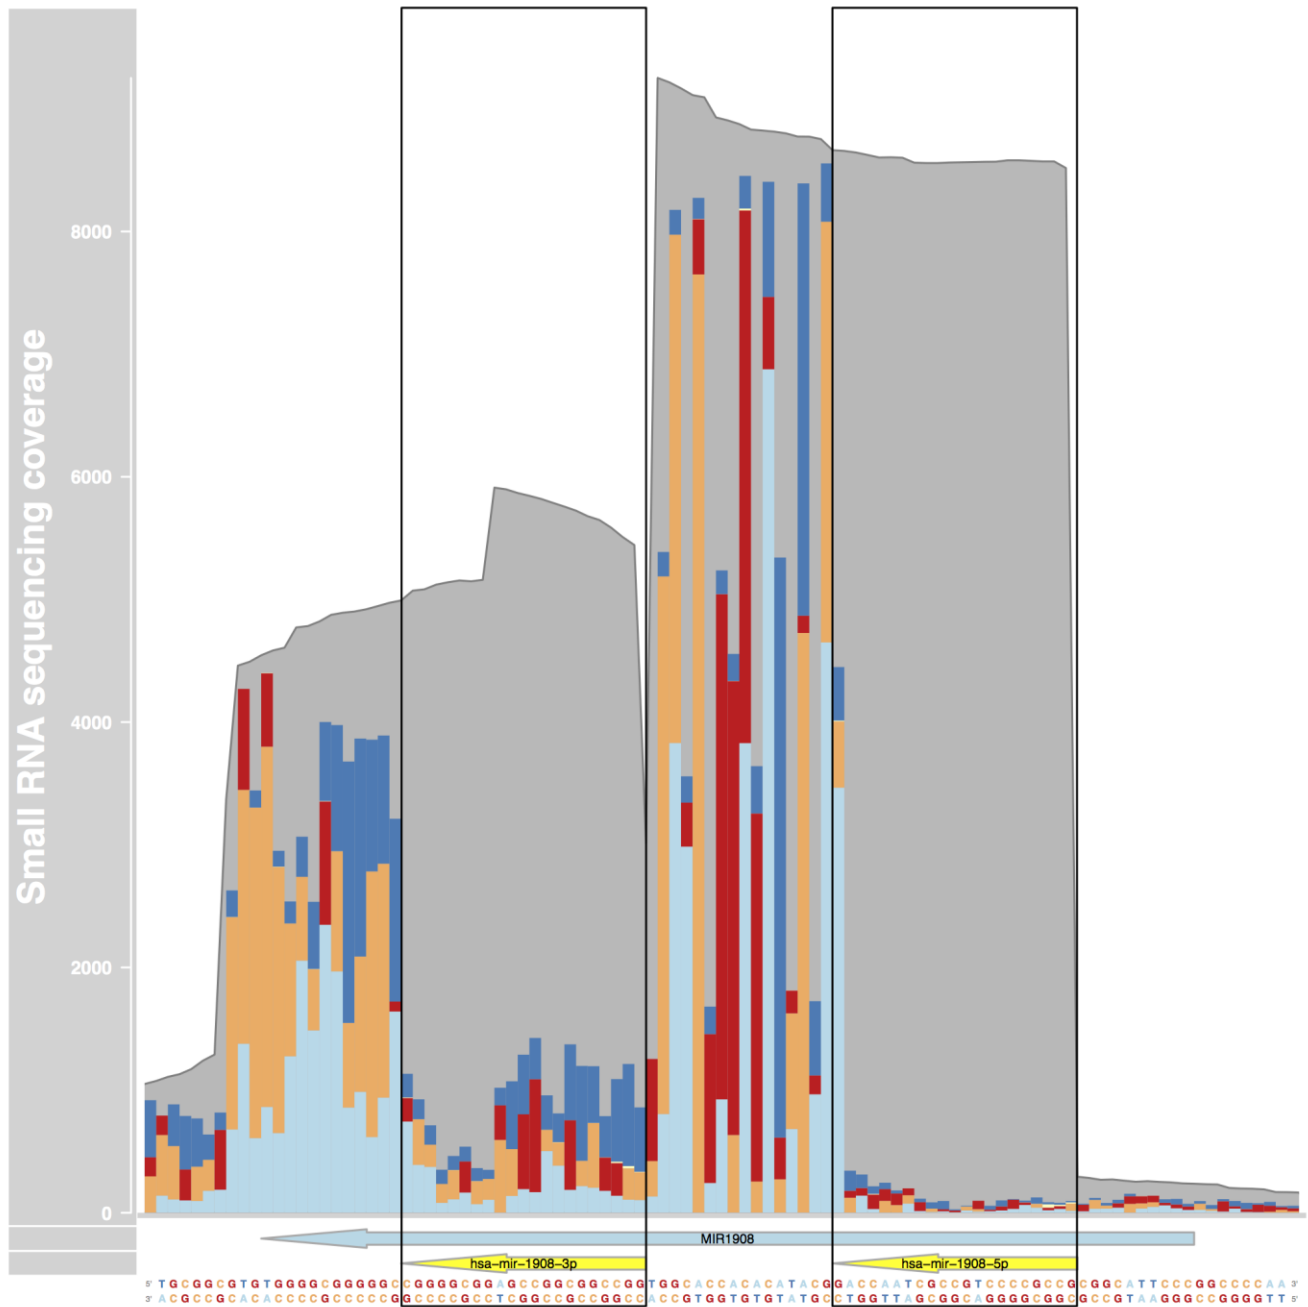

**Figure 6: Small RNA sequencing reads mapped to mir-1908 including the mature hsa-miR-1908-5p (right) and hsa-miR-1908-3p (left) miRNAs and to its surrounding sequence.** The mismatches downstream of the mature miRNA sequences can be attributed to Illumina primers and adapters (as the read length is 36 exceeding miRNA length).

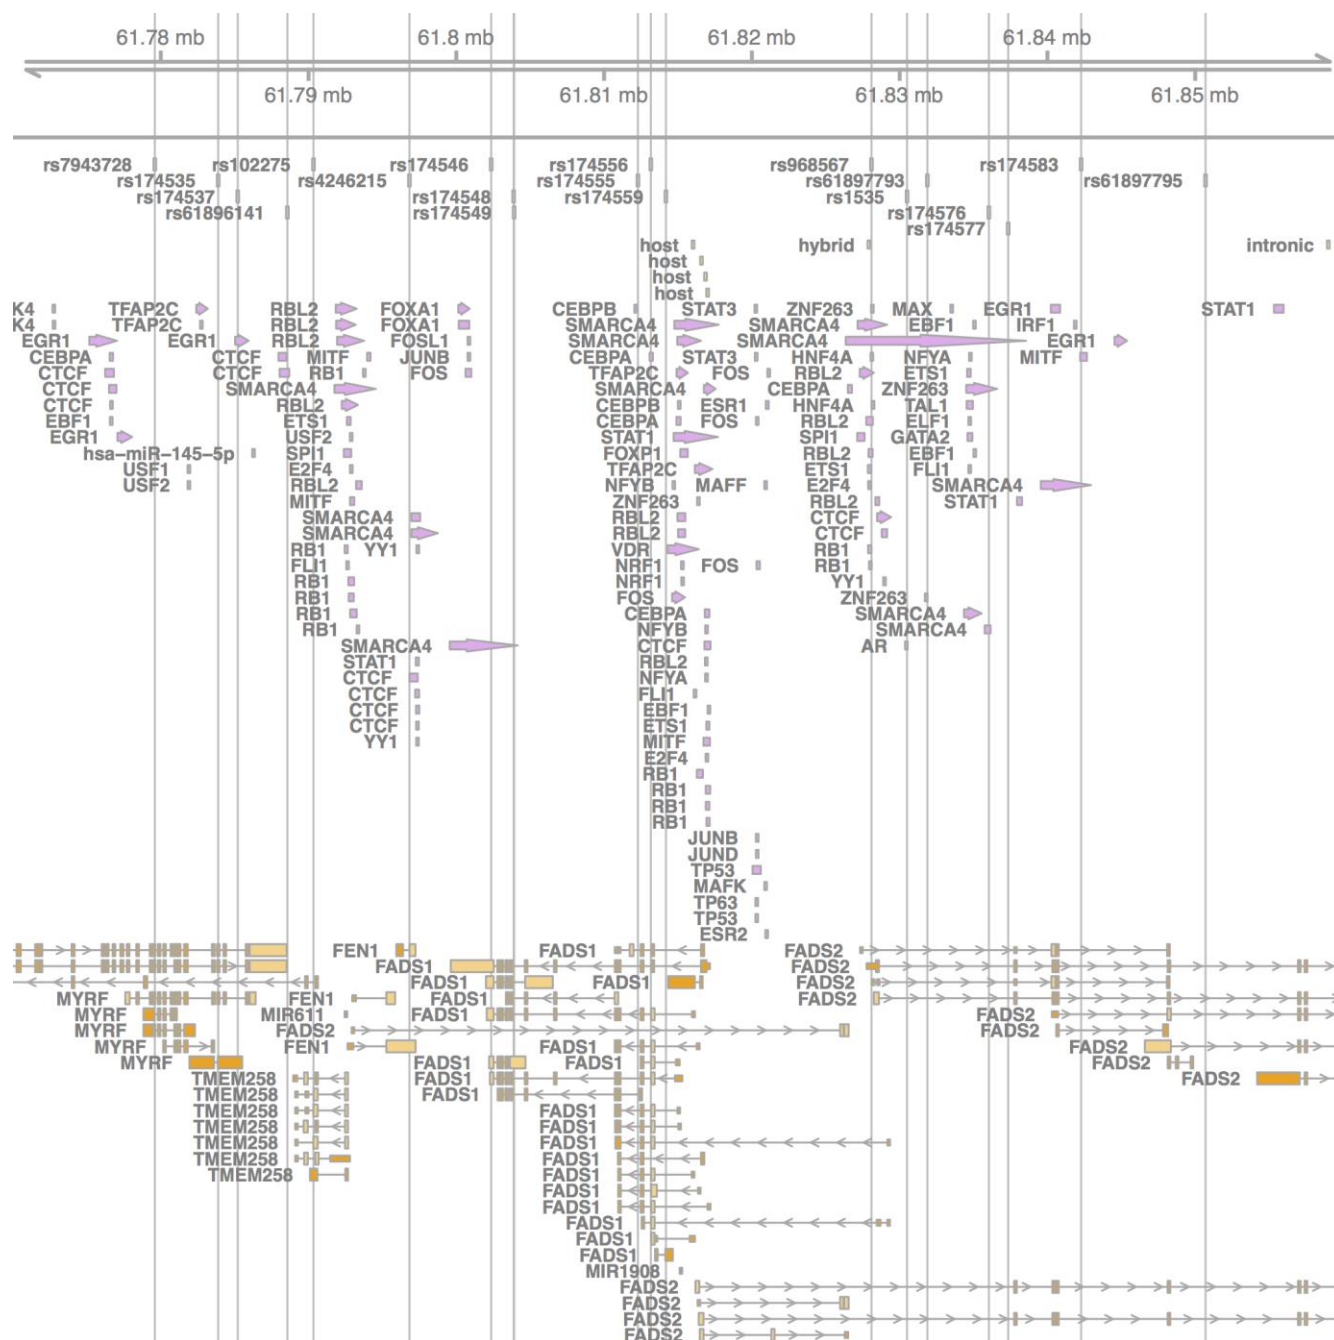

**Figure 7: Visualization of GWAS SNPs that are miRNA eQTLs together with overlapping transcripts.** Regulatory regions from Oreganno are labeled with corresponding targeting transcription factors (pink) and miRNA promoters predicted by Marsico et al. (18)

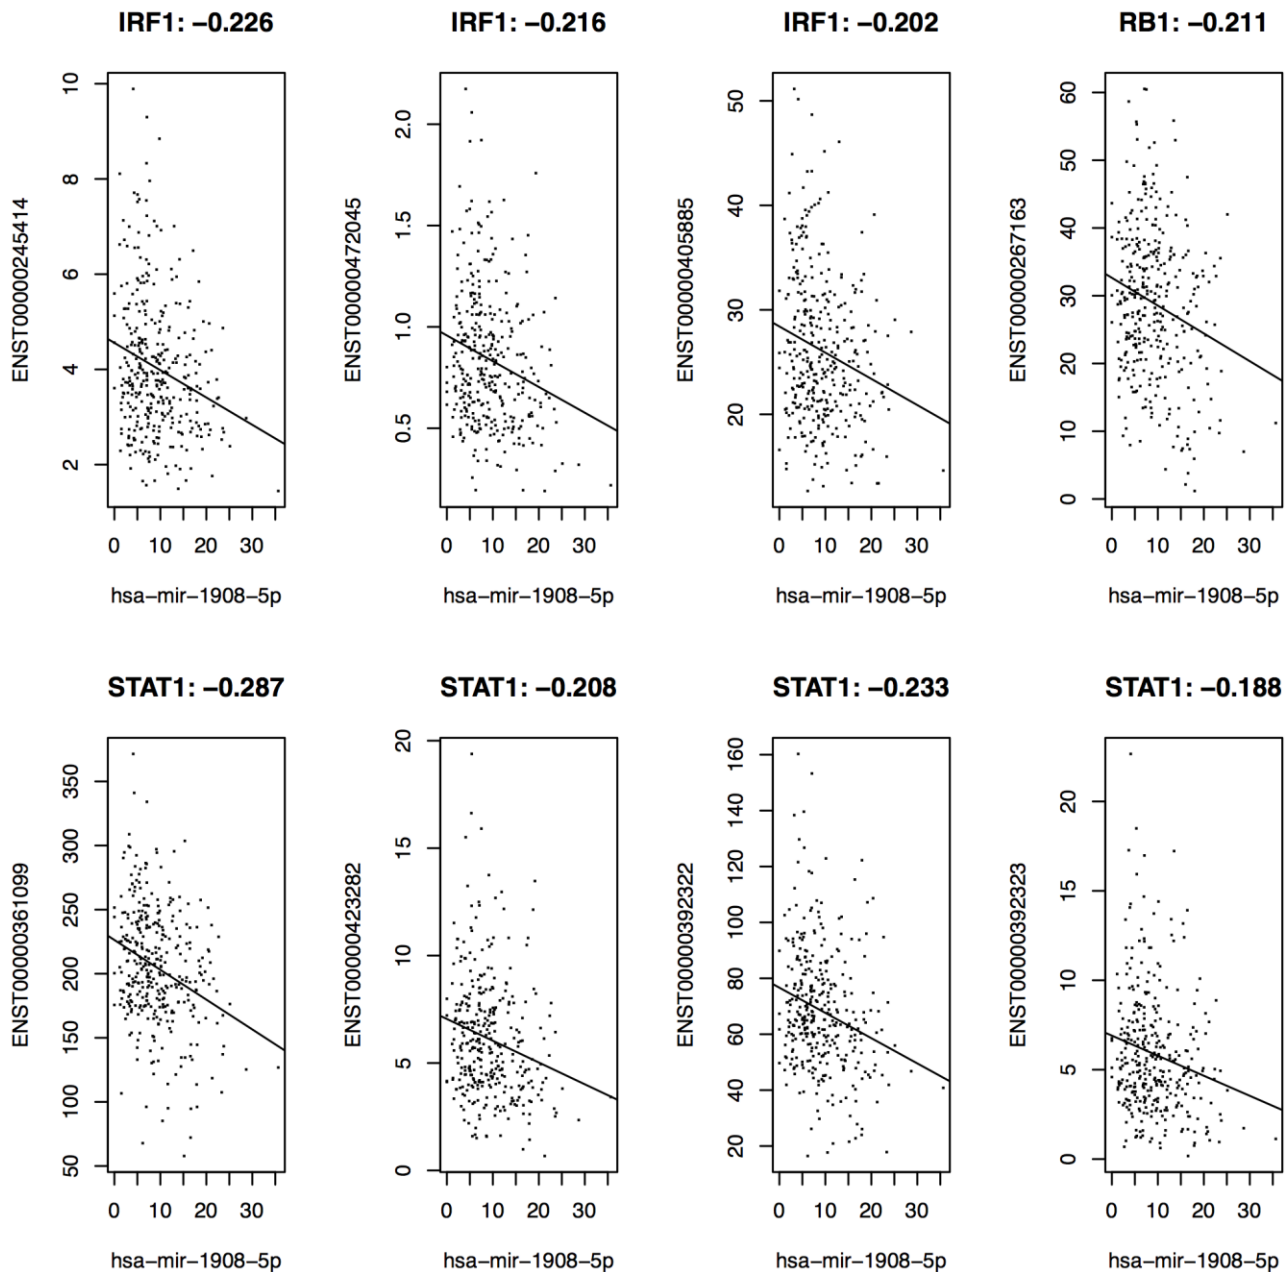

**Figure 8: Expression of transcription factors (in TPM) predicted to target the region surrounding SNP rs968567 correlated with the corresponding miRNA expression.** The correlation is reported in the title of each figure, only significant transcripts with p-value <0.01 are depicted.

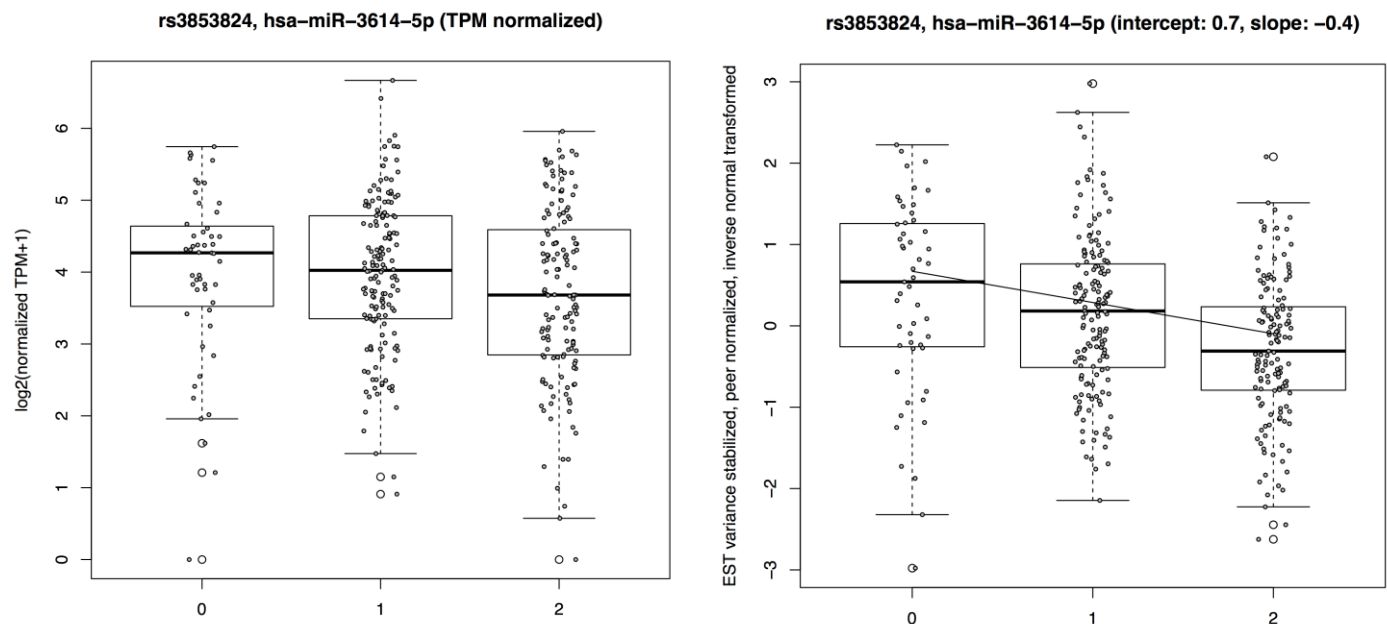

**Figure 9: hsa-miR-3614-5p gene expression levels according to genotypes of Crohn's disease risk SNP rs3853824.** See Suppl. Figure 2 for legend.



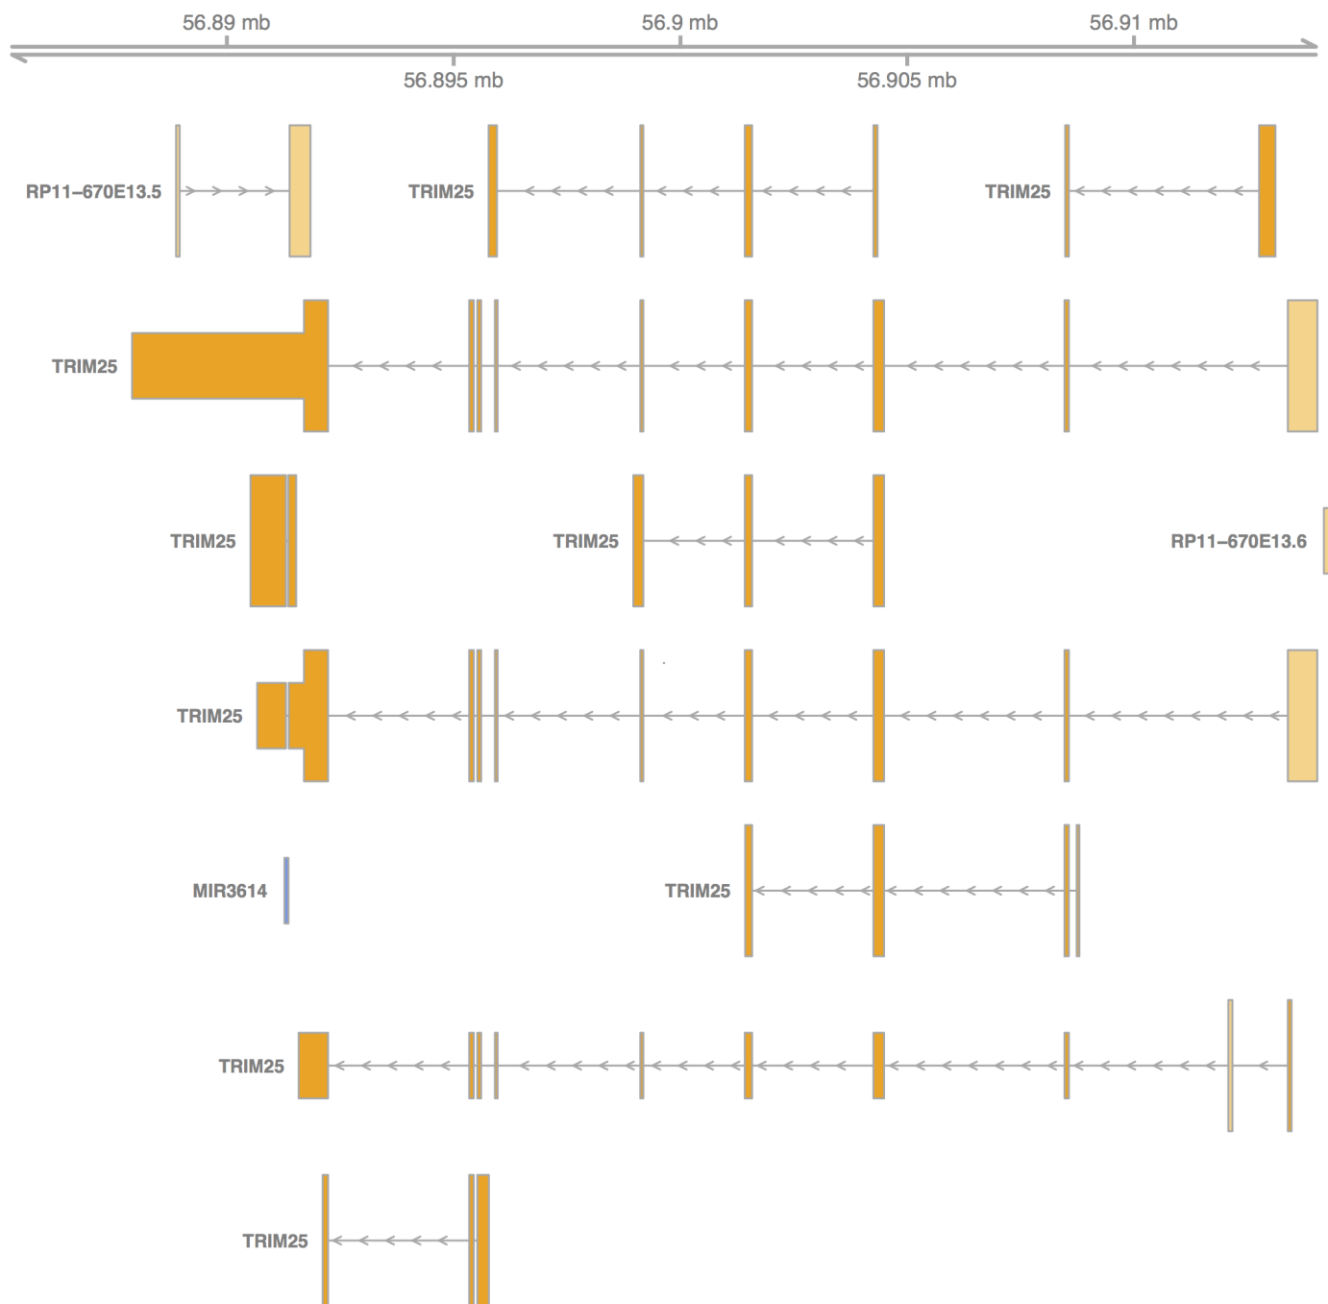

**Figure 10: Region of transcripts that overlap mir-3614.** Narrow boxes denote untranslated regions.

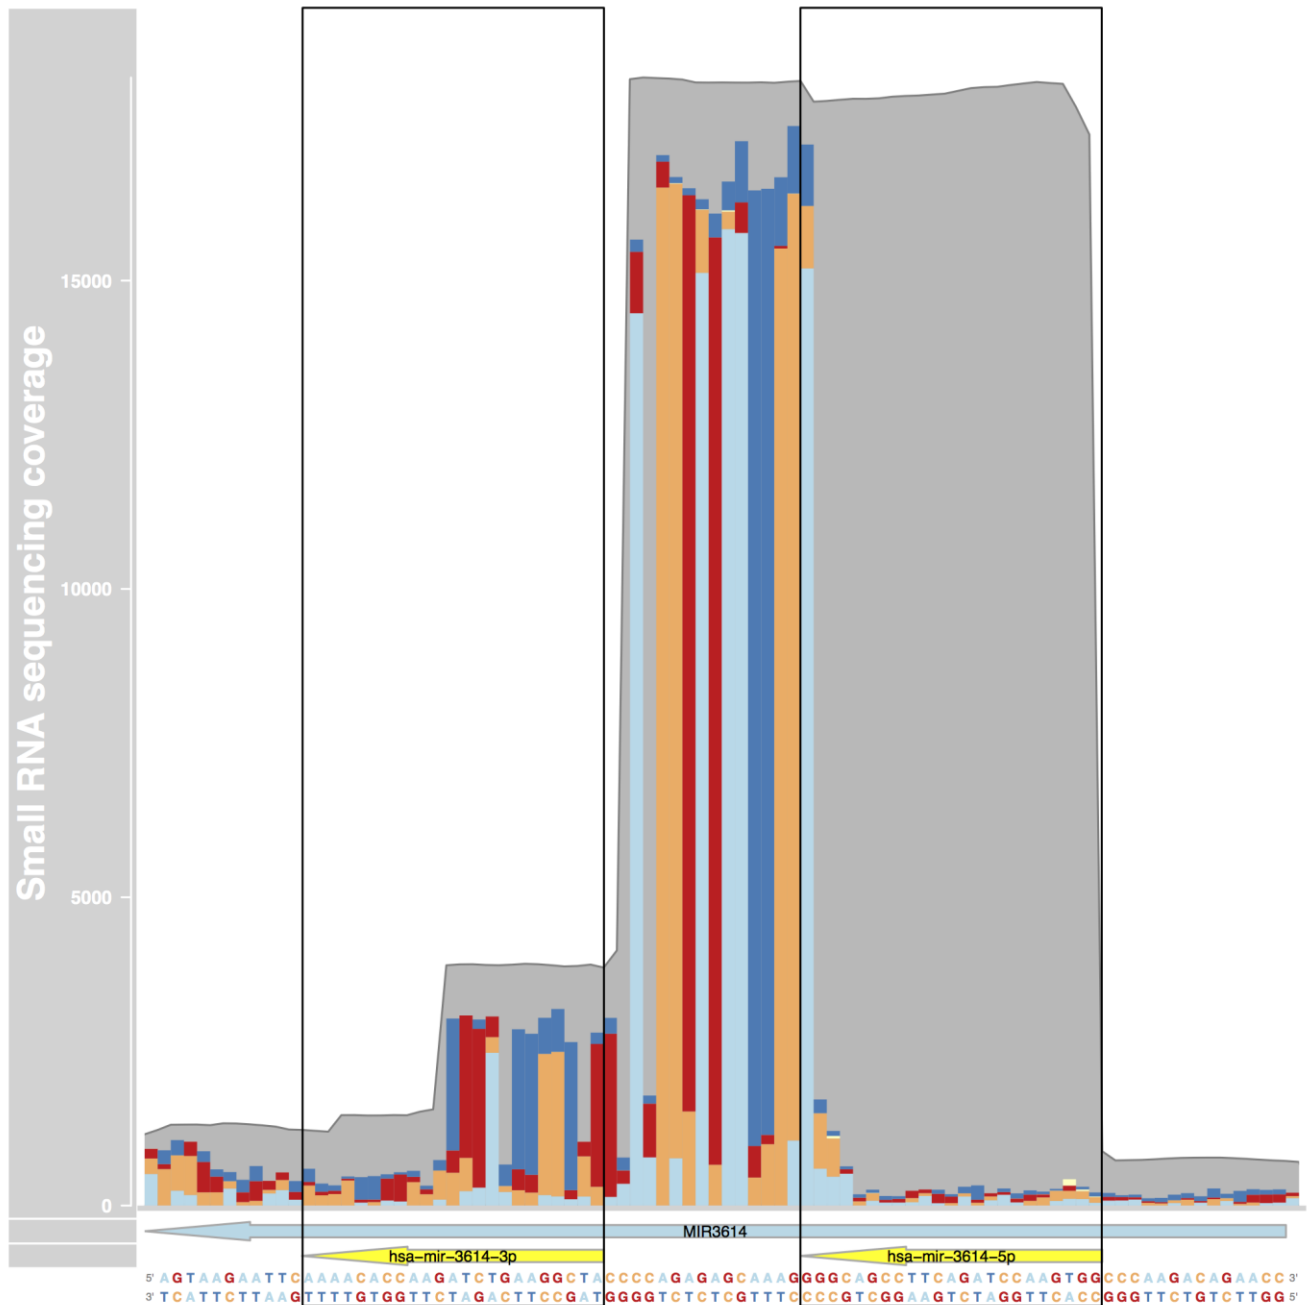

**Figure 11: Small RNA sequencing reads mapped to mir-3614 including the mature hsa-miR-3614-5p (right) and hsa-miR-3614-3p (left) miRNAs and to its surrounding sequence.** The mismatches downstream of the mature miRNA sequences can be attributed to Illumina primes and adapters, which also have been sequenced since read length is 36, which exceeds miRNA length.

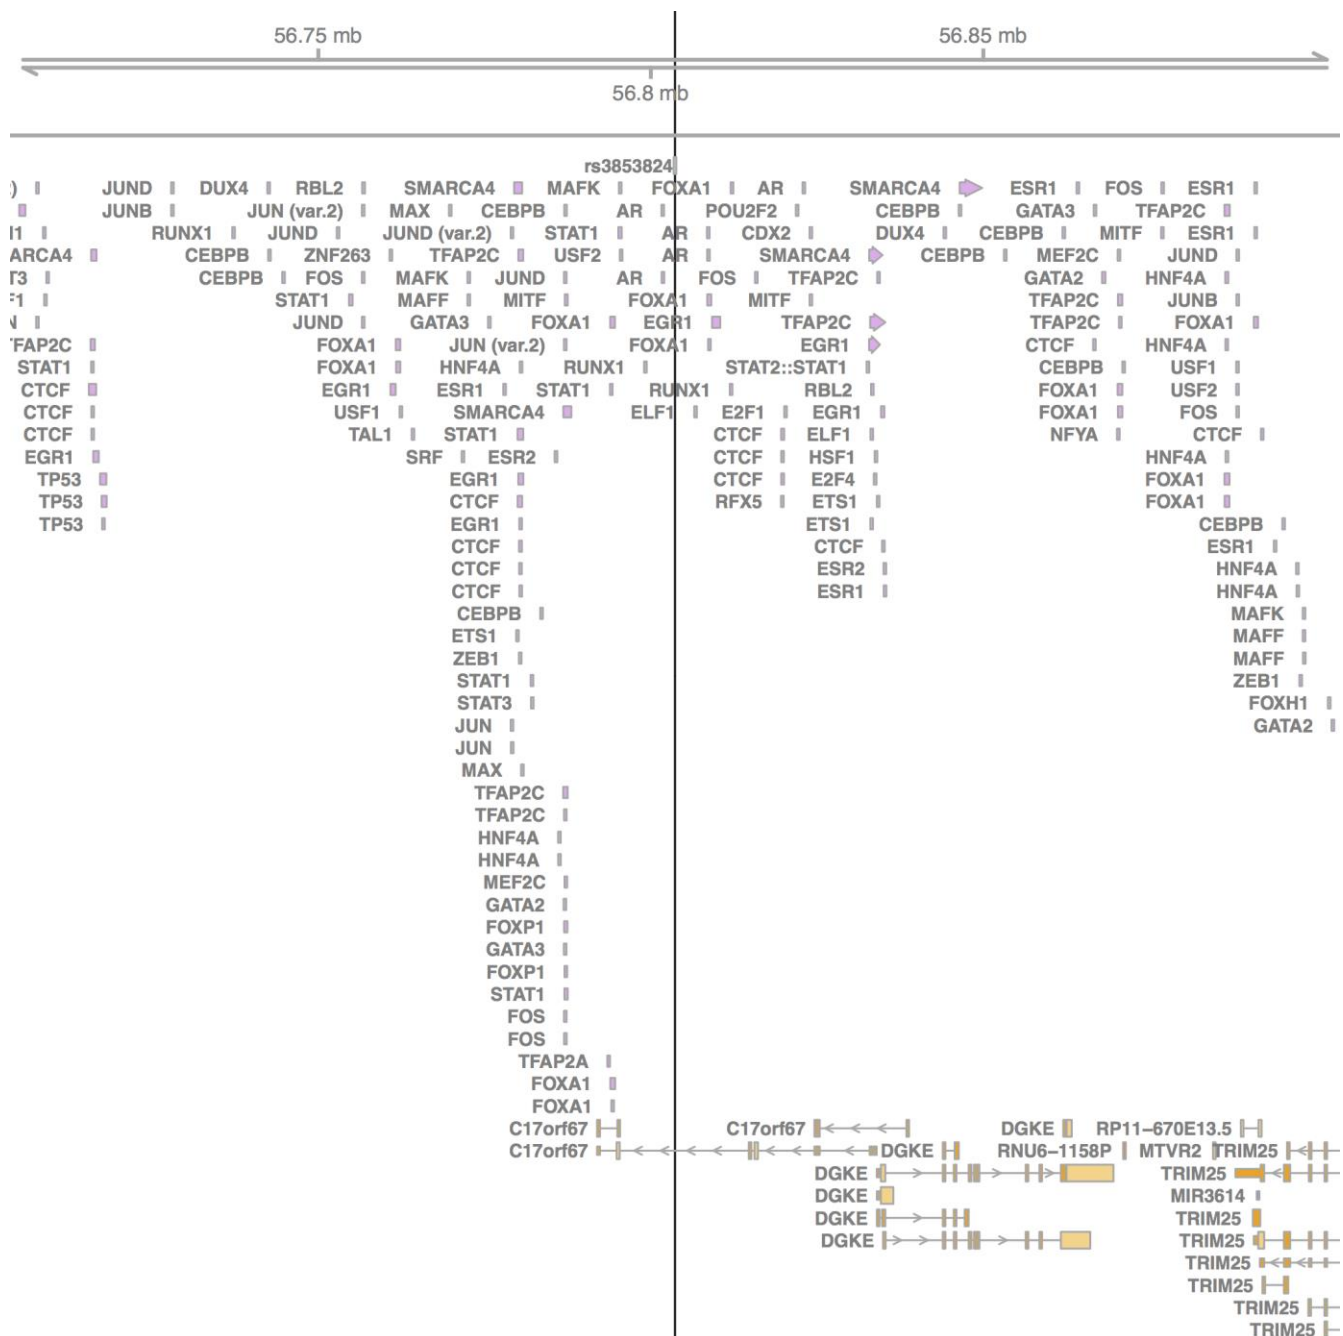

**Figure 12: SNP rs3853824 together with genes in the region (yellow) and regulatory regions from Oreganno labeled with corresponding targeting transcription factors (pink) and mir-3614.**

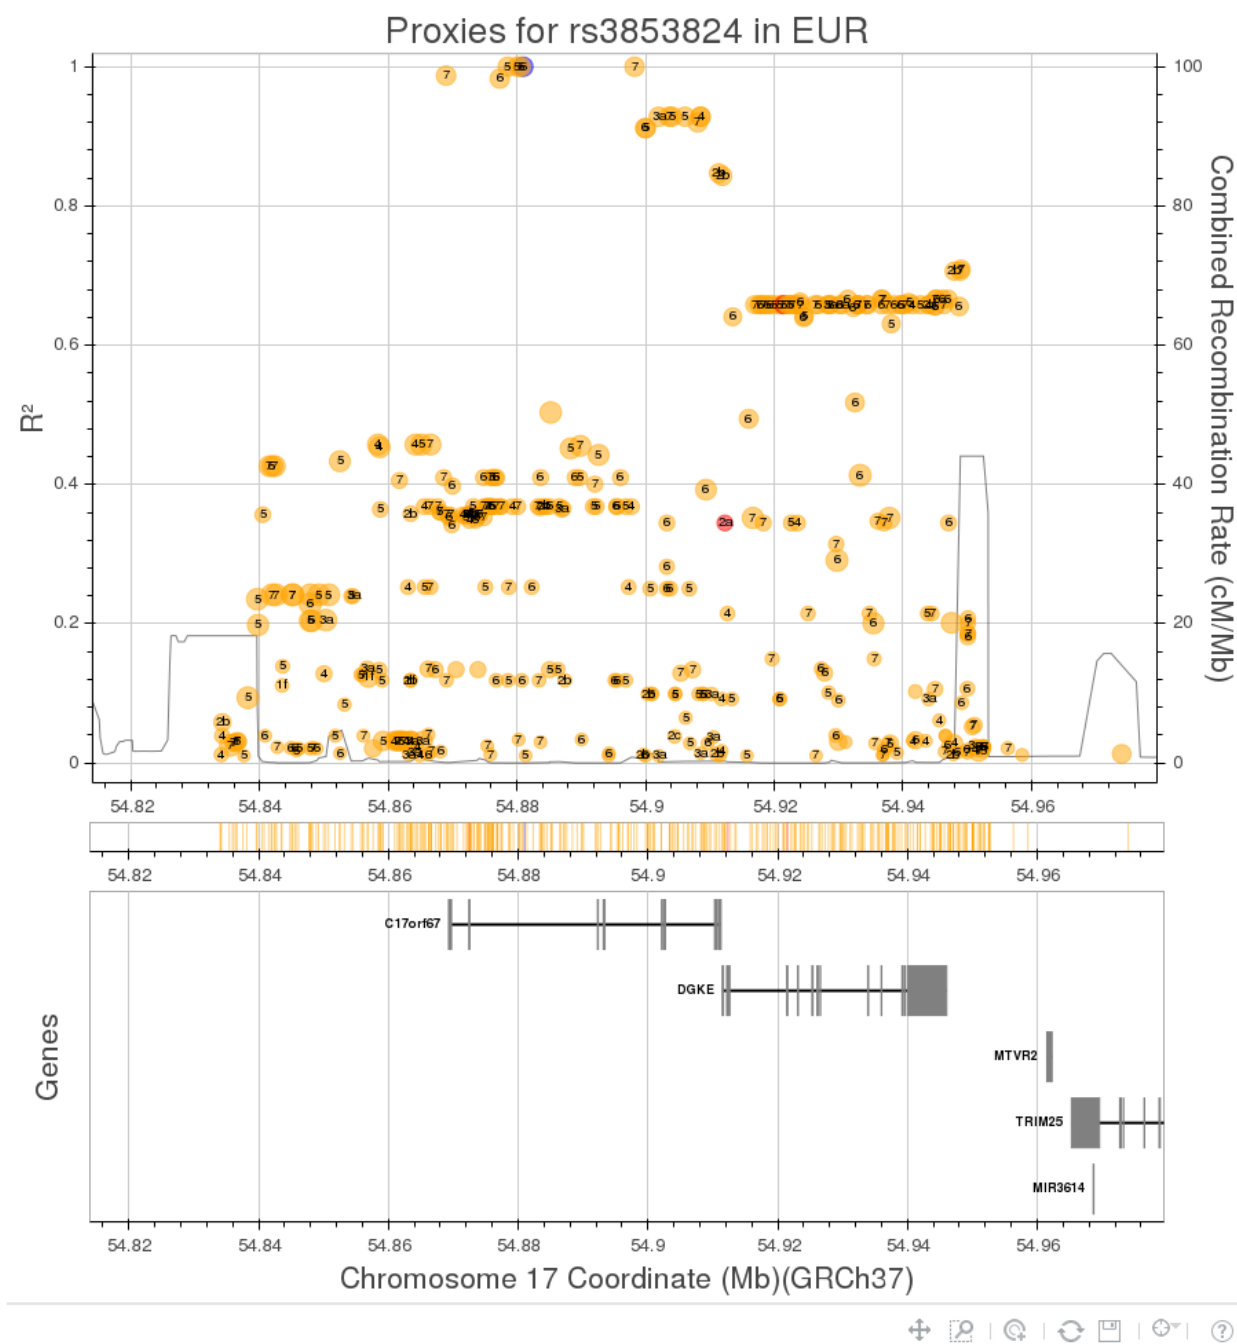

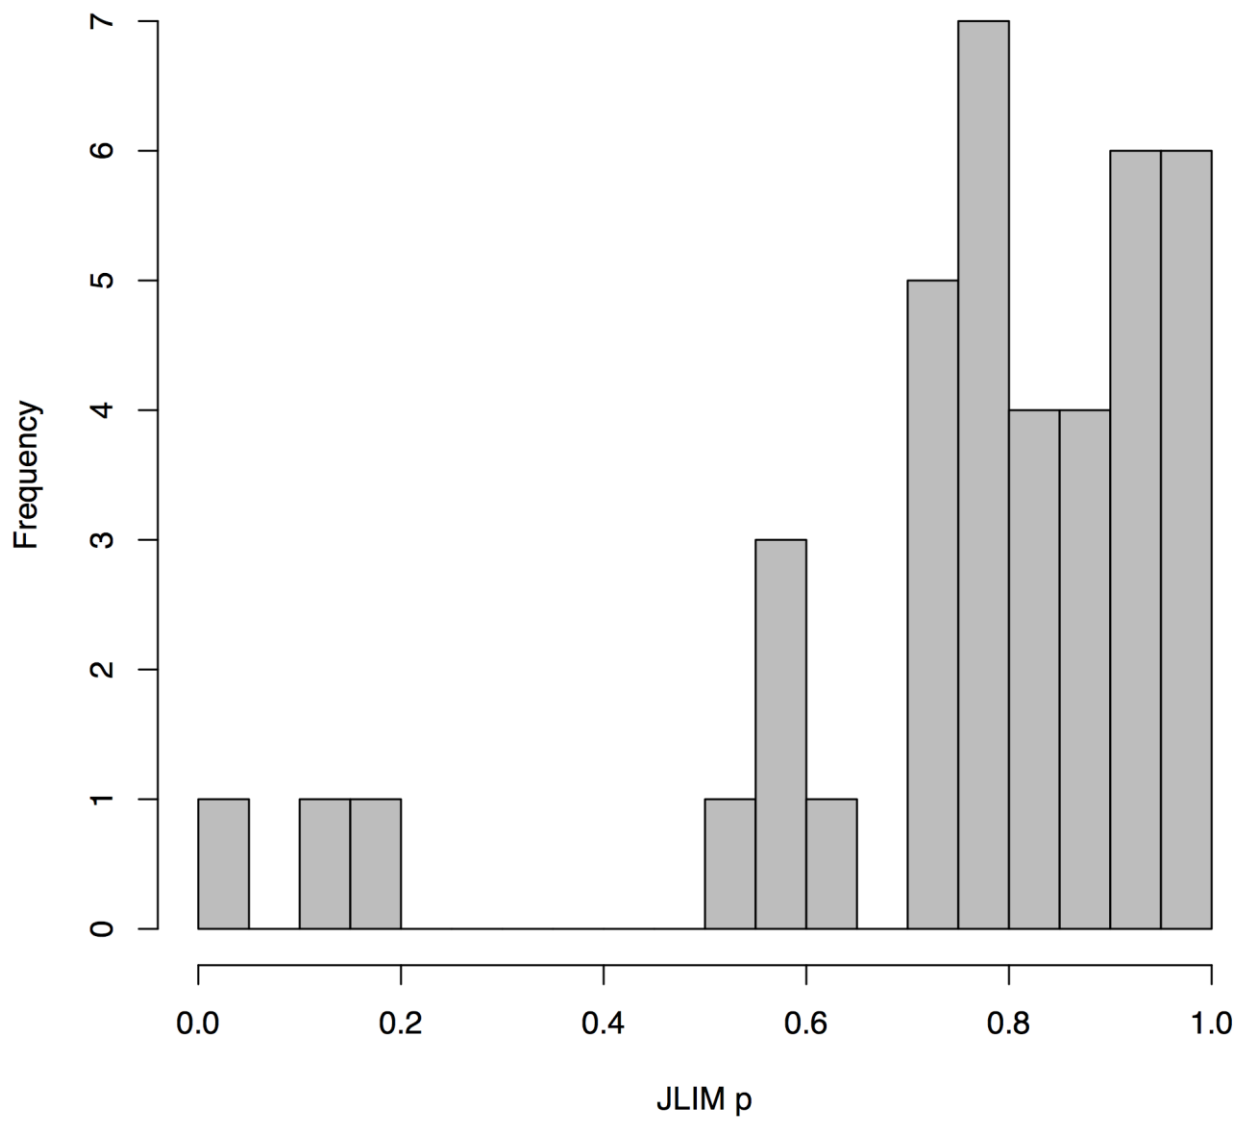

**Figure 14: Histogram of JLIM p-values.**

## References

1. Danecek P, Auton A, Abecasis G, Albers CA, Banks E, DePristo MA, et al. The variant call format and VCFtools. *Bioinforma Oxf Engl*. 2011 Aug;27(15):2156–2158.
2. Abraham G, Inouye M. Fast principal component analysis of large-scale genome-wide data. *PLoS One*. 2014 Apr;9(4):e93766.
3. Chang CC, Chow CC, Tellier LC, Vattikuti S, Purcell SM, Lee JJ. Second-generation PLINK: rising to the challenge of larger and richer datasets. *GigaScience*. 2015 Feb;4:7.
4. Patterson N, Price AL, Reich D. Population structure and eigenanalysis. *PLoS Genet*. 2006 Dec;2(12):e190.
5. Bray NL, Pimentel H, Melsted P, Pachter L. Near-optimal probabilistic RNA-seq quantification. *Nat Biotechnol*. 2016 May;34(5):525–7.
6. Lappalainen T, Sammeth M, Friedländer MR, 't Hoen PAC, Monlong J, Rivas MA, et al. Transcriptome and genome sequencing uncovers functional variation in humans. *Nature*. 2013 Sep;501(7468):506–511.
7. Love MI, Huber W, Anders S. Moderated estimation of fold change and dispersion for RNA-seq data with DESeq2. *Genome Biol*. 2014;15(12):550.
8. Stegle O, Parts L, Piipari M, Winn J, Durbin R. Using probabilistic estimation of expression residuals (PEER) to obtain increased power and interpretability of gene expression analyses. *Nat Protoc*. 2012 Mar;7(3):500–507.
9. Stegle O, Parts L, Durbin R, Winn J. A Bayesian framework to account for complex non-genetic factors in gene expression levels greatly increases power in eQTL studies. *PLoS Comput Biol*. 2010 May;6(5):e1000770.
10. Onengut-Gumuscu S, Chen W-M, Burren O, Cooper NJ, Quinlan AR, Mychaleckyj JC, et al. Fine mapping of type 1 diabetes susceptibility loci and evidence for colocalization of causal variants with lymphoid gene enhancers. *Nat Genet*. 2015 Apr;47(4):381–386.
11. Eyre S, Bowes J, Diogo D, Lee A, Barton A, Martin P, et al. High-density genetic mapping identifies new susceptibility loci for rheumatoid arthritis. *Nat Genet*. 2012 Dec;44(12):1336–1340.
12. Trynka G, Hunt KA, Bockett NA, Romanos J, Mistry V, Szperl A, et al. Dense genotyping identifies and localizes multiple common and rare variant association signals in celiac disease. *Nat Genet*. 2011 Nov;43(12):1193–1201.
13. International Multiple Sclerosis Genetics Consortium (IMSGC), Beecham AH, Patsopoulos NA, Xifara DK, Davis MF, Kempainen A, et al. Analysis of immune-related loci identifies 48 new susceptibility variants for multiple sclerosis. *Nat Genet*. 2013 Nov;45(11):1353–1360.

14. Liu JZ, Almarri MA, Gaffney DJ, Mells GF, Jostins L, Cordell HJ, et al. Dense fine-mapping study identifies new susceptibility loci for primary biliary cirrhosis. *Nat Genet.* 2012 Oct;44(10):1137–1141.
15. International Genetics of Ankylosing Spondylitis Consortium (IGAS), Cortes A, Hadler J, Pointon JP, Robinson PC, Karaderi T, et al. Identification of multiple risk variants for ankylosing spondylitis through high-density genotyping of immune-related loci. *Nat Genet.* 2013 Jul;45(7):730–8.
16. Faraco J, Lin L, Kornum BR, Kenny EE, Trynka G, Einen M, et al. ImmunoChip study implicates antigen presentation to T cells in narcolepsy. *PLoS Genet.* 2013 Feb;9(2):e1003270.
17. Tsoi LC, Spain SL, Knight J, Ellinghaus E, Stuart PE, Capon F, et al. Identification of 15 new psoriasis susceptibility loci highlights the role of innate immunity. *Nat Genet.* 2012 Dec;44(12):1341–1348.
18. Marsico A, Huska MR, Lasserre J, Hu H, Vucicevic D, Musahl A, et al. PROMiRNA: a new miRNA promoter recognition method uncovers the complex regulation of intronic miRNAs. *Genome Biol.* 2013 Aug;14(8):R84.
19. Machiela MJ, Chanock SJ. LDlink: a web-based application for exploring population-specific haplotype structure and linking correlated alleles of possible functional variants. *Bioinforma Oxf Engl.* 2015 Nov;31(21):3555–3557.
